# Supplementary material
Source: Springer Nature journal article supplement (https://www.springermedizin.de/resource/supplementary/12889_2011_3792_MOESM2_ESM.pdf/9489864)

**Estimated Effect of Age on Body Mass Index (BMI) by Classification**

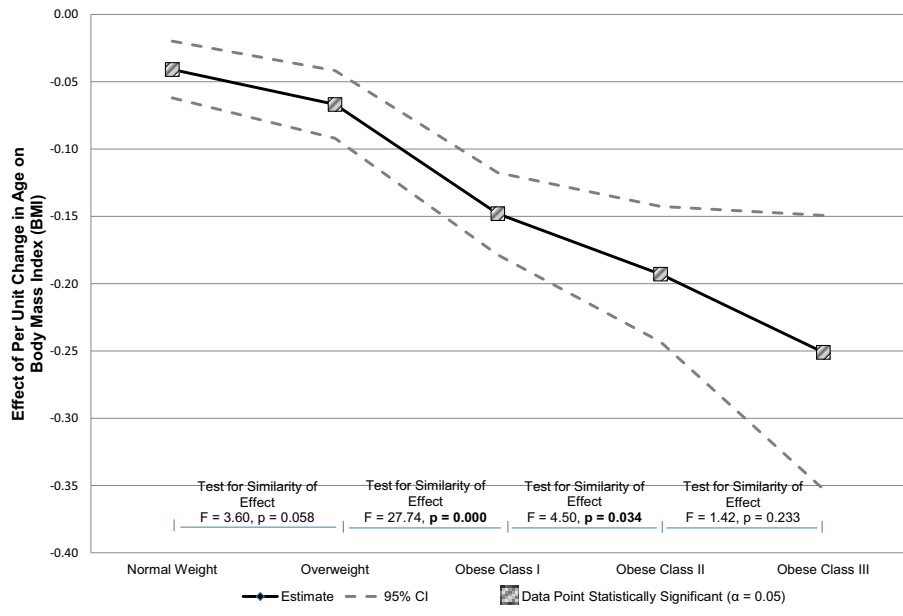

**Estimated Effect of Sex on Body Mass Index (BMI) by Classification**

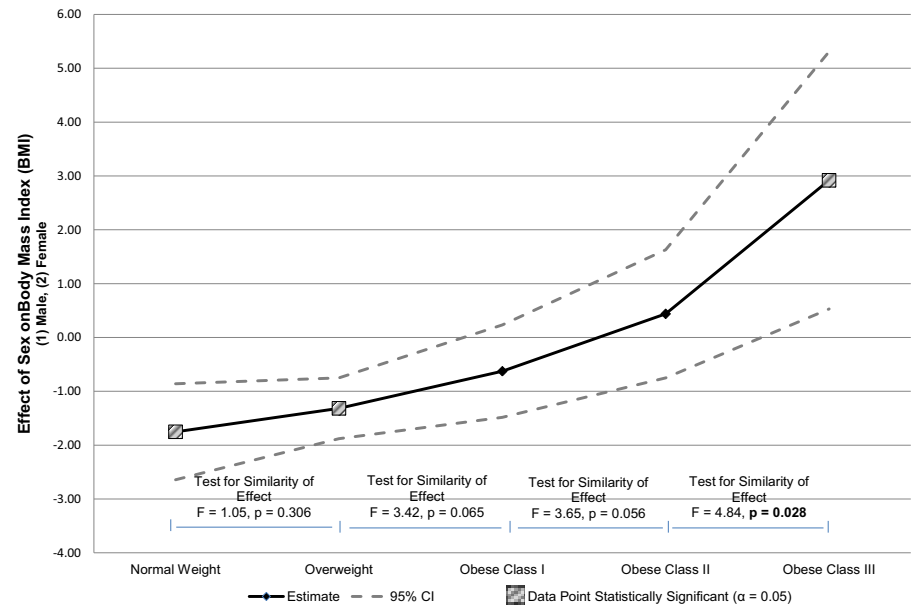

**Estimated Effect of Educational Attainment on Body Mass Index (BMI) by Classification**

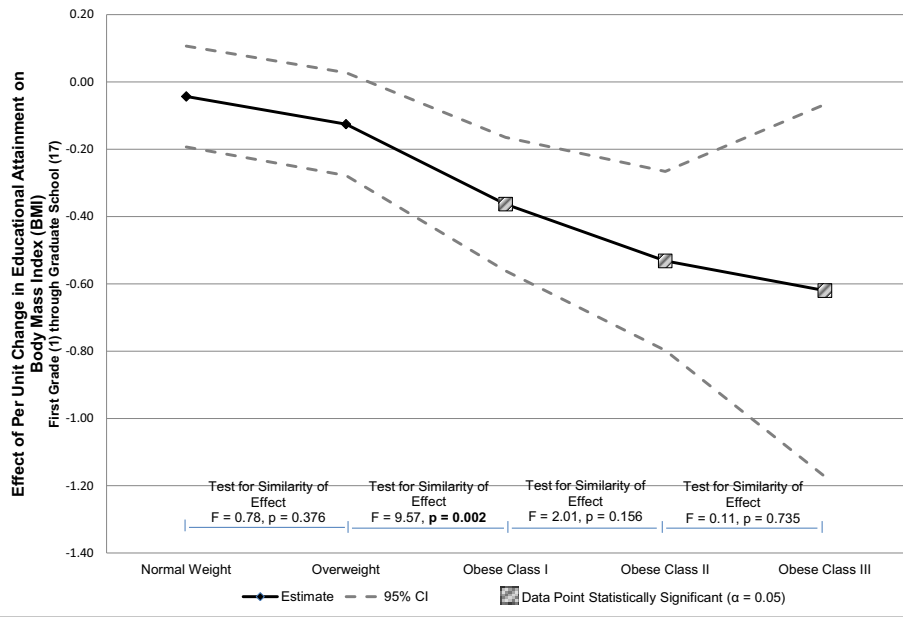

**Estimated Effect of Rurality on Body Mass Index (BMI) by Classification**

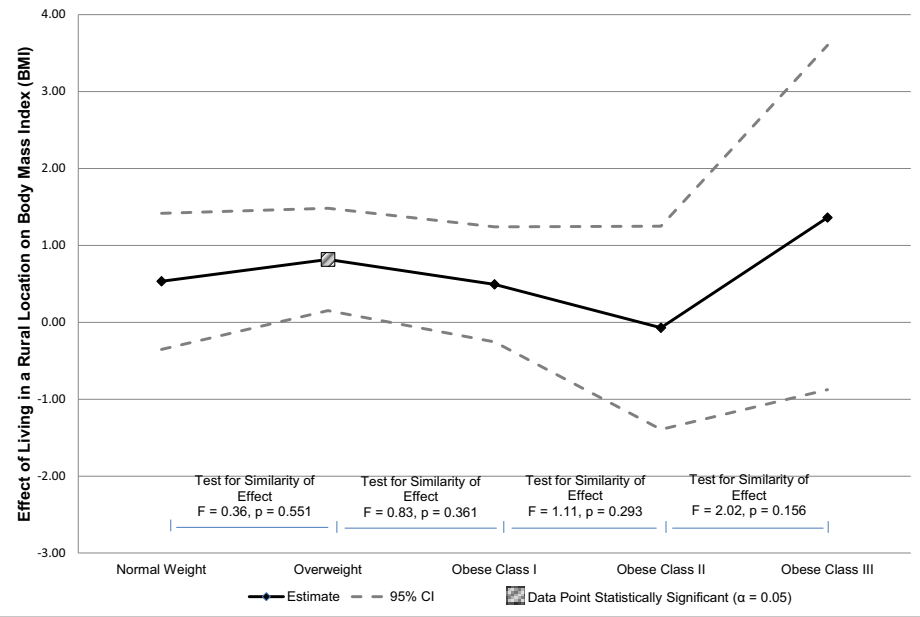

Supplement: MOESM2 [file 9489864]
